1 **Title:**

2

3 Mitochondrial DNA has strong selective effects across the nuclear genome

4

5 **Authors:**

6

7 Timothy M. Healy and Ronald S. Burton

8

9 Marine Biology Research Division, Scripps Institution of Oceanography, University of  
10 California San Diego, 9500 Gilman Drive #0202, La Jolla, CA, USA

11

12 **Abstract:**

13

14 Oxidative phosphorylation requires gene products encoded in both the nuclear and  
15 mitochondrial genomes, and is the primary source of cellular energy in eukaryotes. As a  
16 result, functional integration between the genomes is essential for efficient ATP  
17 generation in these organisms. Although within populations this integration is presumably  
18 maintained by coevolution, both the importance of coevolution in speciation and  
19 mitochondrial disease, and the strength of selection for maintenance of coevolved  
20 genotypes are widely questioned. In this study, we crossed populations of the intertidal  
21 copepod, *Tigriopus californicus*, to disrupt putatively coevolved mitonuclear genotypes  
22 in reciprocal F<sub>2</sub> hybrids. We utilized inter-individual variation in developmental rate, a  
23 proxy for fitness, among these hybrids to assess the strength of selection imposed on the  
24 nuclear genome by alternate mitochondrial genotypes. There was substantial variation in  
25 developmental rate among hybrid individuals, and *in vitro* ATP synthesis rates of  
26 mitochondria isolated from high fitness hybrids were approximately twice those of  
27 mitochondria isolated from low fitness individuals. Furthermore, we used Pool-seq to  
28 reveal large deviations in nuclear allele frequencies in hybrids, which favored maternal  
29 alleles in only high fitness individuals of each reciprocal cross. Therefore, our most fit  
30 hybrids had partial recovery of coevolved genotypes, indicating that mitonuclear effects  
31 underlie individual-level variation in developmental rate and that inter-genomic  
32 compatibility is critical for high fitness. These results demonstrate that mitonuclear  
33 interactions have profound impacts on both physiological performance and the  
34 evolutionary trajectory of the nuclear genome.

35

36

37 **Introduction:**

38           Oxidative phosphorylation in the mitochondria is central to the functioning of  
39 essentially all eukaryotic cells, and thus is critical for the majority of complex life (Rand  
40 et al., 2004; Lane, 2005; Wallace, 2010a; Hill, 2015). Over evolutionary time most  
41 mitochondrial genes have translocated to the nucleus, but a small number that are  
42 necessary for ATP generation are still encoded within the mitochondria: typically 13  
43 protein coding, 2 rRNA and 22 tRNA genes in bilaterian animals (Levin et al., 2014).  
44 These genes require functional interactions with nuclear-encoded proteins, and thus  
45 mitochondrial performance relies upon integration between the nuclear and mitochondrial  
46 genomes (Rand et al., 2004; Lane, 2005; Hill, 2015). Consequently, there is predicted to  
47 be strong selection for mitonuclear compatibility between interacting genes (i.e.,  
48 coevolution) in isolated populations and species (Sloan et al., 2017; Hill et al., 2018).

49           Despite the likelihood of strong selection for compatible mitonuclear genotypes,  
50 coevolved mitochondrial and nuclear genes may be disassociated by hybridization when  
51 isolated populations experience secondary contact (Burton & Barreto, 2012). Mismatches  
52 between mitochondrial-encoded and nuclear-encoded alleles can have profound negative  
53 phenotypic consequences across many traits (i.e., hybrid breakdown), ranging from  
54 diseases in humans (Wallace, 2010b) to life-history effects in invertebrates (Burton,  
55 1990; Ellison & Burton, 2008b; Meiklejohn et al., 2013). These examples of Bateson-  
56 Dobzhansky-Muller incompatibilities (Bateson, 1909; Dobzhansky, 1937; Muller, 1942)  
57 may have important implications for post-zygotic isolation between species (Gershoni et  
58 al., 2009; Hill, 2016, 2019), and mitochondrial replacement therapies in humans  
59 (Reinhardt et al., 2013). However, the ubiquity and relevance of these implications have

60 been questioned for humans specifically (Eyre-Walker, 2017), and for eukaryotes  
61 generally (Sloan et al., 2017). Therefore, determining the extent to which mitonuclear  
62 interactions influence evolution of the nuclear genome, and the degree to which inter-  
63 genomic incompatibilities result in negative fitness consequences are critical for  
64 understanding the role of mitochondrial DNA in shaping the physiological performance  
65 and evolution of eukaryotes.

66 In the current study, we address these issues using hybrids between a San Diego,  
67 CA (SD) and a Santa Cruz, CA (SC) population of the intertidal copepod *Tigriopus*  
68 *californicus*. This species is found in supralittoral tidepools along the west coast of North  
69 America from Baja California, Mexico to Alaska, USA with extremely low gene flow  
70 between isolated populations on different rocky outcrops (Burton, 1997). This isolation  
71 has led to high levels of genetic divergence among populations (Burton & Lee, 1994;  
72 Burton 1997; Edmands, 2001; Peterson et al., 2013; Pereira et al., 2016 Barreto et al.,  
73 2018), and F<sub>2</sub> hybrids from inter-population laboratory crosses typically display  
74 breakdown of mitochondrial ATP synthesis capacities and several fitness-related life-  
75 history traits, including fecundity and developmental rate (Burton, 1990; Edmands, 1999;  
76 Ganz & Burton, 1995; Ellison & Burton, 2008b, Burton et al., 2006). This loss of  
77 performance is recovered by backcrossing hybrids to the maternal, but not the paternal,  
78 parental population (Ellison & Burton, 2008b), which, since mitochondrial DNA is  
79 maternally inherited (Burton & Barreto, 2012), clearly implicates a role for mitonuclear  
80 interactions in hybrid breakdown in this species. Here, we reasoned that if there is strong  
81 selection for mitonuclear matching throughout ontogeny (Hill et al., 2018), then there  
82 should be clear physiological and genetic associations with variation in fitness-related

83 traits among F<sub>2</sub> hybrids. Thus, we utilized inter-individual differences in developmental  
84 rate and ATP synthesis rate in combination with Pool-seq to assess the importance of, and  
85 strength of selection for, coevolved mitonuclear genomes in eukaryotes.

## 86 **Materials and methods:**

### 87 *Copepod collection and culturing*

88 Adult copepods were collected with fine-mesh dip nets and large plastic pipettes  
89 from splashpools near San Diego, CA (SD; 32° 45' N, 117° 15' W) and Santa Cruz, CA  
90 (SC; 36° 56' N, 122° 02' W) in the spring of 2018. Collected animals were transported  
91 back to Scripps Institution of Oceanography in 1 L plastic bottles containing water  
92 collected from the tidepools. Collections were split into approximately fifteen 200 mL  
93 laboratory cultures that were established in 400 mL glass beakers, and held across four  
94 incubators for laboratory acclimations. Acclimation conditions (20 °C, 36 ppt and 12:12  
95 light:dark) were maintained for at least one month (approximately one generation) prior  
96 to the start of all experiments. Copepods consumed natural algal growth in the cultures as  
97 well as a mixture of ground fish flakes and powdered Spirulina that were fed to each  
98 culture ad lib.

### 99 *Inter-population crosses*

100 Prior to mating, male *T. californicus* clasp juvenile females forming a breeding  
101 pair (Burton, 1985). Females mate only once, and thus separation of precopulatory  
102 breeding pairs allows the isolation of virgin females for experimental crosses (Burton,  
103 1985). Two sets of reciprocal crosses were made between SD and SC copepods. First, for  
104 assessment of variation in ATP synthesis rates (see below), 40 pairs of each population  
105 were gently teased apart with a needle (e.g., Burton et al., 1981), and males of one

106 population were combined with females of the other population in 10 cm petri dishes  
107 containing ~60 mL of filtered seawater. Copepods were allowed to pair, and the dishes  
108 were monitored for the appearance of gravid females, which, when observed, were  
109 moved to a new dish. These females were allowed to produce multiple egg sacs each in  
110 the new dish, and were removed once F<sub>1</sub> offspring were visible. F<sub>1</sub> offspring matured and  
111 haphazardly formed breeding pairs. Gravid females were again moved to a new dish, and  
112 were monitored until mature (red) F<sub>2</sub> egg sacs were observed. Second, for isolation of  
113 DNA for Pool-seq (see below), 120 pairs of each population were separated, and  
114 reciprocal F<sub>2</sub> hybrid egg sacs were obtained as described above. Throughout the  
115 experimental crosses holding conditions and feeding routines were the same as those for  
116 the initial laboratory acclimations.

#### 117 *Inter-individual variation in developmental time*

118 Variation in developmental rate among individuals was assessed for both parental  
119 and F<sub>2</sub> hybrid copepods by measurement of time to metamorphosis (e.g., Harada et al.,  
120 2019). *T. californicus* development consists of 6 naupliar stages, 5 copepodid stages and  
121 the final adult stage (Tsuboko-Ishii & Burton, 2018). The majority of stages are visually  
122 cryptic; however, there is a substantial metamorphosis between the final naupliar stage  
123 and initial copepodid stage (i.e., copepodid stage I), which can be observed through a  
124 microscope. To score inter-individual differences in developmental rate, gravid females  
125 with red egg sacs were pipetted onto filter paper, egg sacs were removed with a fine  
126 needle, and dissected egg sacs were placed in filtered seawater in 6-well plates ( $\leq 4$  per  
127 well). This procedure synchronizes hatching as dissected mature egg sacs hatch  
128 overnight. Offspring were fed Spirulina, and were monitored daily for the appearance of

129 copepodids. Days post hatch (dph) to metamorphosis was scored for all individuals, and  
130 copepodids were moved to fresh petri dishes after scoring. In total, offspring from 68 SD  
131 egg sacs, 58 SC egg sacs, 352 F<sub>2</sub> SD♀xSC♂ egg sacs (205 for ATP assays and 147 for  
132 Pool-seq) and 314 F<sub>2</sub> SC♀xSD♂ egg sacs (115 for ATP assays and 199 for Pool-seq)  
133 were scored.

#### 134 *ATP synthesis rates*

135 F<sub>2</sub> hybrid copepodids were divided into four developmental time groups: 8-10,  
136 11-13, 14-16 and ≥17 dph to metamorphosis. Development was allowed to continue, and  
137 adults from the 8-10, 11-13 and ≥17 dph groups were used for assessment of maximal  
138 mitochondrial ATP synthesis rates as in Harada et al. (2019). In brief, for each reciprocal  
139 cross, 6 pools of 6 adults from each developmental group were moved to petri dishes with  
140 fresh filtered seawater and no food overnight. Each pool of copepods was then  
141 homogenized in 800 μL of ice-cold homogenization buffer (400 mM sucrose, 100 mM  
142 KCl, 70 mM HEPES, 3 mM EDTA, 6 mM EGTA, 1% BSA, pH 7.6) in 1 mL teflon-on-  
143 glass homogenizers. Homogenates were transferred to 1.5 mL microcentrifuge tubes, and  
144 centrifuged at 1,000 g for 5 min at 4 °C. Supernatants were pipetted to new 1.5 mL tubes,  
145 which were then centrifuged at 11,000 g for 10 min at 4 °C. After removal of the  
146 supernatants, mitochondrial pellets were resuspended in 55 μL of assay buffer (560 mM  
147 sucrose, 100 mM KCl, 70 mM HEPES, 10 mM KH<sub>2</sub>PO<sub>4</sub>, pH 7.6). For the ATP synthesis  
148 assays, 5 μL of a complex I substrate cocktail (final assay substrate concentrations: 5 mM  
149 pyruvate, 2 mM malate and 1 mM ADP) was added to 25 μL of each sample in 0.2 mL  
150 strip tubes. This was done twice for each sample: once for the initial ATP concentration  
151 determinations and once for the ATP synthesis reactions. For initial ATP measurements,

152 CellTiter-Glo (Promega, Madison, WI), which is used for ATP quantification and  
153 prevents additional ATP synthesis, was immediately added to one tube for each sample  
154 after substrate additions. For synthesis reactions, the second tube for each sample was  
155 incubated at 20 °C for 10 min prior to the addition of CellTiter-Glo. All samples were  
156 incubated with CellTiter-Glo at room temperature in the dark for 10 min prior to reading  
157 luminescence with a Fluoroskan Ascent® FL (Thermo Fisher Scientific, Waltham, MA).  
158 Sample luminescence was compared to an ATP standard curve, and ATP synthesis rate  
159 was calculated by subtracting initial ATP concentrations from final ATP concentrations.  
160 Protein content in each sample was measured with NanoOrange Protein Quantification  
161 Kits according to the manufacturer’s instructions (Thermo Fisher Scientific, Waltham,  
162 MA), and was used for ATP synthesis rate normalization. Variation in synthesis rates  
163 among groups was assessed by two-way ANOVA with cross and developmental time as  
164 factors followed by Tukey post-hoc tests in R v3.4.0 (The R Foundation, Vienna,  
165 Austria).

#### 166 *Genomic sequencing and allele frequency determination*

167 Two developmental groups of F<sub>2</sub> hybrid copepodids for each reciprocal cross  
168 were allowed to develop to adulthood: those that metamorphosed 8-12 dph (“fast  
169 developers”) and those that metamorphosed >22 dph (“slow developers”). For each  
170 group, 180 adults (approximately equal numbers of females and males) were pooled for  
171 DNA isolation by phenol-chloroform extraction (Sambrook & Russell, 2006). Briefly,  
172 copepods were rinsed with deionized water and homogenized by hand in 150 µL of  
173 Bender buffer (200 mM sucrose, 100 mM NaCl, 100 mM Tris-HCl pH 9.1, 50 mM  
174 EDTA, 0.5% SDS) in 1.5 mL microcentrifuge tubes. An additional 250 µL of Bender

175 buffer was added to each sample followed by 100 µg of Proteinase K (Thermo Fisher  
176 Scientific, Waltham, MA). Samples were incubated at 56 °C overnight then cooled to  
177 room temperature for ~15 min. 25 µg of RNase A (Thermo Fisher Scientific, Waltham,  
178 MA) was added to each sample prior to a 37 °C incubation for 30 min, which was  
179 followed by addition of 200 µL of 5M potassium acetate and a 10 min incubation on ice.  
180 Samples were then centrifuged at 13,000 g for 10 min at 4 °C, supernatants were  
181 transferred to 2.0 mL microcentrifuge tubes, and 400 µL of UltraPure™ Buffer-Saturated  
182 Phenol (Thermo Fisher Scientific, Waltham, MA) and 400 µL of OmniPur® Chloroform  
183 (EMD Millipore Corporation, Darmstadt, Germany) were added to each supernatant. The  
184 phenol-chloroform mixtures were then gently mixed for 1 min, and centrifuged at 20,000  
185 g for 5 min at 4 °C. Aqueous phases were transferred to new 2.0 mL tubes, and organic  
186 phases were back-extracted as above to maximize DNA yield. 400 µL of chloroform was  
187 again added to each aqueous phase for re-extraction: samples were centrifuged at 15,000  
188 g for 1 min at 4 °C, aqueous phases were transferred to new 2.0 mL tubes, and again  
189 organic phases were back-extracted repeating the above procedure. 1,200 µL of ice-cold  
190 95% ethanol was added to each aqueous phase; tubes were incubated at -20 °C for 1 h to  
191 facilitate DNA precipitation, and then centrifuged at 16,000 g for 20 min at 4 °C. 95%  
192 ethanol was removed by pipette, and all pellets for a sample (from back-extractions etc.)  
193 were combined in 1,000 µL of ice-cold 75% ethanol. Samples were then centrifuged at  
194 16,000 g for 5 min at 4 °C. 75% ethanol was removed by pipette followed by an  
195 additional 16,000 g centrifugation for 1 min at 4 °C. Any remaining ethanol was removed  
196 and samples were dried in air for 20 min then resuspended in UltraPure™ Distilled Water  
197 (Thermo Fisher Scientific, Waltham, MA). DNA isolations were quantified with a



198 Qubit® 2.0 Fluorometer and a dsDNA HS assay kit according to the manufacturer's  
199 instructions (Thermo Fisher Scientific, Waltham, MA).

200       Approximately 1 µg of genomic DNA for each pool was sent to Novogene Co.,  
201 Ltd. (Sacramento, CA) for whole-genome 150 bp paired-end sequencing on a NovaSeq  
202 6000 (Illumina Inc., San Diego, CA). Between 59,765,048 and 74,464,410 paired reads  
203 were obtained for each sample, which were trimmed to remove adapter sequences and  
204 base pairs with Phred scores less than 25. After trimming, reads with less than 50 bp  
205 remaining were removed. BWA MEM v0.7.12 (Li & Durbin, 2009) was used to align the  
206 filtered reads to the SD *T. californicus* reference genome v2.1 (Barreto et al., 2018) and  
207 an updated SC reference genome, which was prepared as described in Barreto et al.  
208 (2018) and Lima et al. (2019). Prior to read mapping the references were equalized such  
209 that any “N” position in one reference was also an “N” in the other reference. Mapping  
210 hybrid sample reads to both parental references allows calculation of average allele  
211 frequency estimates between the mappings, which accounts for mapping biases between  
212 matched and mismatched allelic reads (Lima & Willett, 2018). Read mappings with  
213 MAPQ scores less than 20 were discarded, resulting in average genome coverage values  
214 between 65X and 83X for all sample-to-reference combinations (Tables 1, 2). 2,768,859  
215 biallelic single nucleotide polymorphisms (SNPs) that are fixed between the SD and SC  
216 populations were identified using the previously published methods (Lima & Willett,  
217 2018; Lima et al., 2019) with population-specific sequencing reads obtained from Barreto  
218 et al. (2018). Briefly, population-specific reads were mapped to the other population's  
219 reference genome, and variant loci with minor allele frequencies of 0 in both mappings  
220 were kept as fixed inter-population SNPs. Sample allele frequencies at these SNPs were

221 determined using PoPoolation2 (Kofler et al., 2011) for all sites that had a minimum  
222 coverage of at least 4 for the minor allele in the mappings to both parental reference  
223 genomes (as in Lima et al., 2019). Estimated allele frequencies for each sample were  
224 averaged between the two mappings to account for mapping biases, and mean allele  
225 frequencies were calculated for non-overlapping 250 kb windows along each  
226 chromosome, which reduces noise in allele frequency estimates as a single generation of  
227 recombination between SD and SC chromosomes (which occurs only in males in *T.*  
228 *californicus* [Burton et al., 1981]) is not expected to break apart large chromosomal  
229 blocks in F<sub>2</sub> hybrids (Lima & Willett, 2018).

230       Deviations in F<sub>2</sub> allele frequencies associated with mitonuclear effects between  
231 fast and slow developers were detected for each cross as in Lima et al. (2019). First,  
232 average maternal allele frequencies were calculated for non-overlapping 2 Mb blocks  
233 along each chromosome (7-9 blocks per chromosome), and Kolmogorov-Smirnov (KS)  
234 tests in R v3.4.0 were used to assess if the allele frequencies across each chromosome in  
235 each pool were drawn from the same distribution. False-discovery rate associated with  
236 multiple tests was accounted for by Bonferroni correction of  $\alpha = 0.05$ . Second, for  
237 chromosomes with significant KS test results, the tenth ( $q_{0.1}$ ) and ninetieth ( $q_{0.9}$ ) quantiles  
238 of the allele frequencies calculated over 250 kb blocks were compared between fast and  
239 slow developers. Lack of overlap between the quantiles is consistent with a potential  
240 mitonuclear effect on developmental rate. These potential effects were then resolved by  
241 comparisons between the reciprocal crosses; higher maternal allele frequencies in the fast  
242 developers than the slow developers in both reciprocals or in one reciprocal with no allele  
243 deviations in the other reciprocal are consistent with effects of mitonuclear matching. In

244 contrast, higher paternal alleles frequencies in fast developers using the same  
245 comparisons are consistent with mitonuclear mismatching. Third, allele frequency  
246 deviations greater than or equal to  $\pm 0.05$  were identified, as this minimum deviation has  
247 been suggested as a threshold for chromosomal regions most likely to contain genes  
248 involved in mitonuclear effects using these methods (Lima & Willett, 2018). These  
249 analyses were repeated comparing SD allele frequencies between the reciprocal crosses  
250 for the fast and slow pools separately as an alternative test of allele deviations consistent  
251 with mitonuclear incompatibilities. In fast developers, greater frequencies of the SD allele  
252 in the  $SD_{\text{♀}} \times SC_{\text{♂}}$  than the  $SC_{\text{♀}} \times SD_{\text{♂}}$  cross are consistent with effects of mitonuclear  
253 matching. In contrast, expected patterns in slow developers are more challenging to  
254 predict. For example, lower frequencies of the SD allele in the slow developing  
255  $SD_{\text{♀}} \times SC_{\text{♂}}$  copepods than in the slow developing  $SC_{\text{♀}} \times SD_{\text{♂}}$  copepods would be  
256 consistent with effects of mitonuclear incompatibilities. However, because different sites  
257 of mismatches could independently cause similar negative phenotypic effects and  
258 individuals with many mismatches might be expected to fail development at early stages,  
259 it is also possible that few allelic deviations would be expected in slow developers even if  
260 mitonuclear interactions affected developmental rate. Finally, effects of nuclear genetic  
261 variation alone were assessed by determining the chromosomes for which allele  
262 frequencies deviated in the same direction from 0.5 in both fast developing reciprocal  
263 pools or both slow developing reciprocal pools, such that  $q_{0.1}$  and  $q_{0.9}$  did not overlap  
264 with 0.52 or 0.48 in either reciprocal. These boundaries are likely conservative quantile  
265 limits for neutral variation in allele frequency estimates using these methods (Lima &  
266 Willett, 2018; Lima et al., 2019).

267 **Results:**

268           Developmental rates were similar in both parental populations of *T. californicus*  
269 with metamorphosis occurring approximately 8-22 days post hatch (dph) for ~98% of  
270 nauplii (maximum dph of 29 and 24 for SD and SC, respectively; Fig. 1A). In contrast,  
271 the distributions of developmental time among F<sub>2</sub> hybrids from both reciprocal crosses  
272 demonstrated a substantial skew favoring higher dph to metamorphosis compared to the  
273 parental populations, which is consistent with hybrid breakdown (Fig. 1B). In both  
274 crosses, metamorphosis was observed 8-30 dph with 8 out of 473 SD♀xSC♂ nauplii and  
275 245 out of 1,242 SC♀xSD♂ nauplii still present on day 30, which were scored as >30  
276 dph. Preliminary data suggested that the majority of nauplii underwent metamorphosis 9-  
277 16 dph, and thus F<sub>2</sub> hybrids were split into 8-10, 11-13 and ≥17 dph groups to assess  
278 maximal ATP synthesis rates. Complex I-fueled ATP synthesis rates were significantly  
279 affected by both cross ( $F_{1,30} = 11.32$ ;  $P = 2.1 \times 10^{-3}$ ) and developmental group ( $F_{2,30} =$   
280  $13.44$ ;  $P = 6.8 \times 10^{-5}$ ) with no interaction between factors ( $F_{2,30} = 0.44$ ;  $P = 0.65$ ), and  
281 post-hoc tests indicated that 8-10 dph copepods had higher ATP synthesis rates than ≥17  
282 dph copepods in both crosses ( $P \leq 0.04$ ; Fig. 1C). In SC♀xSD♂ hybrids, 11-13 dph  
283 copepods had ATP synthesis rates that were similar to those of 8-10 dph copepods ( $P =$   
284  $0.52$ ) and higher than those of ≥17 dph copepods ( $P = 0.01$ ). In contrast, 11-13 dph  
285 SD♀xSC♂ copepods had intermediate synthesis rates compared to 8-10 and ≥17 dph  
286 copepods ( $P \geq 0.13$  for both comparisons; Fig. 1C).

287           F<sub>2</sub> hybrids from a second set of reciprocal crosses were divided into those that  
288 metamorphosed 8-12 or >22 dph (fast or slow developers, respectively) to assess parental  
289 allele frequency deviations associated with variation in developmental rate. When

290 considering all 2,768,859 SNPs that were fixed between the SD and SC populations,  
291 there were shifts towards higher maternal allele frequencies in fast developers, and higher  
292 paternal allele frequencies in slow developers in each reciprocal cross (Fig. 2). Biases  
293 towards maternal alleles in fast developers became particularly evident when allele  
294 frequencies were examined across chromosomes (Fig. 3), as in both reciprocal crosses  
295 there were significant frequency shifts favoring coevolved alleles in fast developers  
296 across large regions of chromosomes 1, 3, 4 and 5 ( $P \leq 5.8 \times 10^{-4}$ ; Figure 3A). Although  
297 deviations within a single reciprocal could be consistent with nuclear-only effects, the  
298 observation of maternal biases in both crosses clearly suggests involvement of  
299 mitonuclear interactions. Patterns consistent with mitonuclear effects were also detected  
300 for chromosomes 2 and 8 in SC♀xSD♂ hybrids, as there were biases for SC alleles in  
301 fast developers in this cross ( $P = 5.8 \times 10^{-4}$  for both; Fig. 3B), and these alleles were not  
302 favored in fast developing SD♀xSC♂ hybrids. Additionally, there were significant  
303 potential mitonuclear effects on chromosomes 7 and 12 in the SC♀xSD♂ cross ( $P \leq 1.6 \times$   
304  $10^{-4}$  for both; Fig. 3B); however, these patterns were subtle relative to those on other  
305 chromosomes. On chromosome 7, SC alleles were more common in fast than in slow  
306 developers, but SC allele frequencies did not exceed 0.5 in either pool, and on  
307 chromosome 12, trends in allele frequencies suggested a similar pattern to the one  
308 observed on chromosome 7, but quantile overlap comparisons did not conclusively  
309 resolve the direction of this potential effect. In general, comparisons between the  
310 reciprocal crosses for fast or slow developers demonstrated similar mitonuclear effects to  
311 those describe above, and there were no clear nuclear-only effects for any chromosome  
312 (Fig. 4). Furthermore, these comparisons detected biases for paternal (i.e., mismatched)

313 nuclear alleles in slow developers (for chromosomes 1, 3, 4, 7 and 12; Fig. 4). Despite the  
314 overall association between high fitness and coevolved mitonuclear genotypes in our  
315 study, allele frequencies across one chromosome in each reciprocal were consistent with  
316 the opposite effect as excess paternal alleles were observed in fast developers  
317 (chromosome 6 for SD♀xSC♂ and chromosome 11 for SC♀xSD♂; Fig. 3). Yet, taken  
318 together these results suggest that mitonuclear interactions are the major genetic factors  
319 contributing to inter-individual variation in developmental rate among F<sub>2</sub> hybrids, and  
320 that in the majority of cases at least partial maintenance of coevolved mitonuclear  
321 genotypes is critical for performance in this fitness-related trait.

## 322 **Discussion:**

323 Mitochondrial DNA contains relatively few genes, but because of the functional  
324 products encoded by these genes and their interactions with nuclear gene products,  
325 differences in mitochondrial genotype are predicted to exert strong selection pressures on  
326 the nuclear genome throughout ontogeny (Hill et al., 2018). In the current study, we  
327 demonstrate substantial consequences of mitonuclear interactions on developmental rate,  
328 ATP synthesis rate, and nuclear allele frequencies in hybrids that are consistent with  
329 strong selection for compatible interactions within even a single generation. In our  
330 reciprocal crosses, coevolved nuclear alleles that matched alternate mitochondrial  
331 genotypes were favored on at least four of the twelve chromosomes in high fitness F<sub>2</sub>  
332 hybrids. Relative to previous studies in *T. californicus* hybrids (Pritchard et al., 2011;  
333 Foley et al., 2013; Lima et al., 2019), this clear pattern towards partial recovery of  
334 coevolved mitonuclear genotypes is most likely a consequence of selecting individuals  
335 based on variation in a fitness-related trait that has been correlated with mitochondrial

336 performance in this species (Ellison & Burton, 2006). Average chromosome-wide allele  
337 frequency deviations favoring coevolved alleles ranged from 0.033 to 0.109 with some  
338 regions favoring these alleles by  $\sim 0.138$  (Figs. 3, 4). F<sub>1</sub> hybrids between SD and SC  
339 (heterozygous across all fixed SNPs) generally show enhanced fitness compared to  
340 parentals (Ellison & Burton, 2008b), and there is little evidence for selection against  
341 heterozygous F<sub>2</sub> hybrids (Pritchard et al., 2011; Foley et al., 2013). Therefore, it is likely  
342 that the major allele frequency deviations in the current study are consequences of  
343 negative effects associated with one of the two possible homozygous genotypes. As a  
344 result, given Mendelian segregation ratios of 1:2:1, the most extreme biases for maternal  
345 alleles in our study are likely indicative of approximately 67-87% deficits of homozygous  
346 paternal genotypes in fast developing F<sub>2</sub> hybrids on some regions of these chromosomes.  
347 Thus, our data demonstrate strong selection favoring mitonuclear compatibility.  
348 Additionally, despite previous detection of nuclear-only effects on intrinsic selection for  
349 survival in *T. californicus* hybrids (Lima et al., 2019), we observed no clear allele  
350 frequency deviations consistent with nuclear-only effects on developmental rate, which  
351 also suggests that mitonuclear incompatibilities are key genetic mechanisms resulting in  
352 loss of fitness in these hybrids.

353 Previous studies have demonstrated at least three candidate mechanisms involved  
354 in coevolution in *T. californicus*: electron transport system complex activities (Willett &  
355 Burton, 2001, 2003; Rawson & Burton, 2002; Harrison & Burton, 2005; Ellison &  
356 Burton, 2008b), mitochondrial transcription (Ellison & Burton, 2008a) and mitonuclear  
357 ribosomal interactions (Barreto & Burton, 2012). Yet, these studies do not directly reveal  
358 the number or relative importance of mitonuclear incompatibilities contributing to hybrid

359 breakdown in this species. In comparison, our Pool-seq approach resolves essentially the  
360 full genomic architecture of breakdown of developmental rate in hybrids between SD and  
361 SC. The substantial biases for maternal alleles across multiple genomic regions in our  
362 most fit hybrids clearly indicate a polygenic basis for mitonuclear coevolution, which  
363 may be attributable to the high level of divergence between the mitochondrial genomes of  
364 these populations (21.7%; Barreto et al., 2018). However, because of the mitochondrion's  
365 central role in metabolism, even minor disruption of mitonuclear interactions can have  
366 major fitness effects (Burton & Barreto, 2012, Hill et al., 2018). For example, mutations  
367 in a single nuclear-encoded mitochondrial tRNA synthetase and one mitochondrial tRNA  
368 lead to mitochondrial dysfunction in *Drosophila* hybrids (Meiklejohn et al., 2013). The  
369 allele frequency variation in our slow developing hybrids is likely consistent with large  
370 effects of few interactions in *T. californicus* as well. Despite an approximately two-fold  
371 reduction in both developmental rate and ATP synthesis rate (Fig. 1), strong deviations  
372 favoring paternal alleles in slow developers were largely absent in our study (with the  
373 exception of chromosome 4 in SD♀xSC♂; Figs. 3, 4). Consequently, our data suggest  
374 that for any given individual, relatively few incompatible interactions are necessary to  
375 result in substantial negative fitness effects.

376         Of the 1,000-1,500 nuclear-encoded mitochondrial (N-mt) genes in metazoans, at  
377 least 180 are expected to have intimate functional interactions with either mitochondrial  
378 DNA or mitochondrial-encoded gene products (N<sub>O</sub>-mt genes) (Burton et al., 2013).  
379 Barreto et al. (2018) identified 599 putative N-mt genes, including 139 N<sub>O</sub>-mt genes, in  
380 the *T. californicus* genome (Figs. 3C, 4C). Although our data begin to resolve which of  
381 these candidates may play the largest roles in inter-genomic coevolution, there was little



382 resolution of allele frequency deviations beyond the level of chromosomes in our hybrids.  
383 This is likely a consequence of only a single opportunity for inter-population  
384 recombination in F<sub>2</sub> hybrids (Lime & Willett, 2018), or involvement of multiple loci  
385 within the same chromosome (Willett et al., 2016). Although N-mt genes were not more  
386 common on the chromosomes with biases for coevolved alleles than on other  
387 chromosomes in our study, chromosomes demonstrating allelic biases tended to have  
388 relatively higher ratios of N<sub>O</sub>-mt genes to other N-mt genes (Fig. 5), which is consistent  
389 with a disproportionate role for N<sub>O</sub>-mt genes in mitonuclear interactions.

390 Taken together, our data demonstrate strong selection against disassociation of  
391 coevolved genes following hybridization, and conversely, strong selection for inter-  
392 genomic compatibility within populations and species. These effects of mitonuclear  
393 interactions are sufficiently strong in *T. californicus* that selection for rapid development  
394 within a single generation identified key sites of mitonuclear interactions across the  
395 genome. Mitonuclear coevolution in this species may be exceptionally strong (Burton et  
396 al., 2006), but our results also suggest that even small numbers of mitonuclear  
397 incompatibilities may result in large losses of fitness. Thus, the findings of the current  
398 study are consistent with suggestions that inter-genomic incompatibilities may play a  
399 significant role in establishing reproductive isolation between populations (Gershoni et  
400 al., 2009; Hill, 2016, 2019). Finally, the potential strength of mitonuclear  
401 incompatibilities, their polygenic nature, their range of impacts and their penetrance  
402 supports calls for continued caution regarding human mitochondrial replacement therapy.

#### 403 **Acknowledgments:**

404 The current study was funded by a National Science Foundation grant to RSB

405 (DEB1551466). The authors thank Drs. Felipe Barreto and Thiago Lima for advice  
406 regarding the sequencing methods and analyses, and Laura Furtado, Antonia Bock and  
407 Rebecca Pak for assistance with copepod culturing.

408 **Author contributions:**

409 T.M.H. and R.S.B. designed the experiments in the current study. T.M.H.  
410 performed the experiments and analyses, and R.S.B. conceived and supervised the study.  
411 T.M.H. prepared the figures, and T.M.H. and R.S.B. wrote the manuscript.

412 **References:**

- 413 Barreto, F. S. & Burton, R. S. Evidence for compensatory evolution of ribosomal proteins  
414 in response to rapid divergence of mitochondrial rRNA. *Mol. Biol. Evol.* **30**, 310-314  
415 (2012).  
416  
417 Barreto, F. S., Watson, E. T., Lima, T. G., Willett, C. S., Edmands, S., Li, W. & Burton,  
418 R. S. Genomic signatures of mitonuclear coevolution across populations of *Tigriopus*  
419 *californicus*. *Nat. Ecol. Evol.* **2**, 1250-1257 (2018).  
420  
421 Bateson, W. Heredity and variation in modern lights. In *Darwin and Modern Science* (ed  
422 Seward, A. C.) (Cambridge University Press, 1909).  
423  
424 Burton, R. S. Genetic evidence for long term persistence of marine invertebrate  
425 populations in an ephemeral environment. *Evolution.* **51**, 993-998 (1997).  
426  
427 Burton, R. S. Hybrid breakdown in developmental time in the copepod *Tigriopus*  
428 *californicus*. *Evolution.* **44**, 1814-1822 (1990).  
429  
430 Burton, R. S. Mating system of the intertidal copepod *Tigriopus californicus*. *Mar. Biol.*  
431 **86**, 247-252 (1985).  
432  
433 Burton, R. S. & Barreto, F. S. A disproportionate role for mtDNA in Dobzhansky-Muller  
434 incompatibilities? *Mol. Ecol.* **21**, 4942-4957 (2012).  
435  
436 Burton, R. S., Ellison, C. K. & Harrison, J. S. The sorry state of F2 hybrids:  
437 consequences of rapid mitochondrial DNA evolution in allopatric populations. *Am. Nat.*  
438 **168**, 14-24 (2006).  
439  
440 Burton, R. S., Feldman, M. W. & Swisher, S. G. Linkage relationships among five  
441 enzyme-coding gene loci in the copepod *Tigriopus californicus*: a genetic confirmation of  
442 achiasmatic meiosis. *Biochem. Genet.* **19**, 1237-1245 (1981).

- 443  
444 Burton, R. S. & Lee, B. N. Nuclear and mitochondrial gene genealogies and allozyme  
445 polymorphism across a major phylogeographic break in the copepod *Tigriopus*  
446 *californicus*. *Proc. Natl. Acad. Sci. USA*. **91**, 5197-5201 (1994).  
447  
448 Burton, R. S., Pereira, R. J. & Barreto, F. S. Cytonuclear genomic interactions and hybrid  
449 breakdown. *Annu. Rev. Ecol. Evol. Syst.* **44**, 281-302 (2013).  
450  
451 Dobzhansky, T. H. *Genetics and the Origin of Species* (Columbia University Press,  
452 1937).  
453  
454 Edmands, S. Heterosis and outbreeding depression in interpopulation crosses spanning a  
455 wide range of divergence. *Evolution*. **53**, 1757-1768 (1999).  
456  
457 Edmands, S. Phylogeography of the intertidal copepod *Tigriopus californicus* reveals  
458 substantially reduced population differentiation at northern latitudes. *Mol. Ecol.* **10**, 1743-  
459 1750 (2001).  
460  
461 Ellison, C. K. & Burton, R. S. Disruption of mitochondrial function in interpopulation  
462 hybrids of *Tigriopus californicus*. *Evolution*. **60**, 1382-1391 (2006).  
463  
464 Ellison, C. K. & Burton, R. S. Genotype-dependent variation of mitochondrial  
465 transcriptional profiles in interpopulation hybrids. *Proc. Natl. Acad. Sci. USA*. **105**,  
466 15831-15836 (2008).  
467  
468 Ellison, C. K. & Burton, R. S. Interpopulation hybrid breakdown maps to the  
469 mitochondrial genome. *Evolution*. **62**, 631-638 (2008b).  
470  
471 Eyre-Walker, A. Mitochondrial replacement therapy: are mito-nuclear interactions likely  
472 to be a problem? *Genetics*. **205**, 1365-1372 (2017).  
473  
474 Foley, B. R., Rose, C. G., Rundle, D. E., Leong, W. & Edmands, S. Postzygotic isolation  
475 involves strong mitochondrial and sex-specific effects in *Tigriopus californicus*, a species  
476 lacking heteromorphic sex chromosomes. *Heredity*. **111**, 391-401 (2013).  
477  
478 Ganz, H. H. & Burton, R. S. Genetic differentiation and reproductive incompatibility  
479 among Baja California populations of the copepod *Tigriopus californicus*. *Mar. Biol.* **123**,  
480 821-827 (1995).  
481  
482 Gershoni, M., Templeton, A. R. & Mishmar, D. Mitochondrial bioenergetics as a major  
483 motive force of speciation. *Bioessays*. **31**, 642-650 (2009).  
484  
485 Harada, A. E., Healy, T. M. & Burton, R. S. Variation in thermal tolerance and its  
486 relationship to mitochondrial function across populations of *Tigriopus californicus*.  
487 *Front. Physiol.* **10**, 213 (2019). <https://doi.org/10.3389/fphys.2019.00213>.  
488

- 489 Harrison, J. S. & Burton, R. S. Tracing hybrid incompatibilities to single amino acid  
490 substitutions. *Mol. Biol. Evol.* **23**, 559-564 (2005).  
491
- 492 Hill, G. E. Mitonuclear coevolution as the genesis of speciation and the mitochondrial  
493 DNA barcode gap. *Ecol. Evol.* **6**, 5831-5842 (2016).  
494
- 495 Hill, G. E. Mitonuclear ecology. *Mol. Biol. Evol.* **32**, 1917-1927 (2015).  
496
- 497 Hill, G. E. Reconciling the mitonuclear compatibility species concept with rampant  
498 mitochondrial introgression. *Integr. Comp. Biol.* icz019 (2019).  
499 <https://doi.org/10.1093/icb/icz019>.  
500
- 501 Hill, G. E., Havird, J. C., Sloan, D. B., Burton, R. S., Greening, C. & Dowling, D. K.  
502 Assessing the fitness consequences of mitonuclear interactions in natural populations.  
503 *Biol. Rev.* **94**, 1089-1104 (2018).  
504
- 505 Kofler, R., Pandey, R. V. & Schlötterer, C. PoPoolation2: identifying differentiation  
506 between populations using sequencing of pooled DNA samples (Pool-Seq).  
507 *Bioinformatics.* **27**, 3435-3436 (2011).  
508
- 509 Lane, N. *Power, Sex, Suicide: Mitochondria and the Meaning of Life* (Oxford University  
510 Press, 2005).  
511
- 512 Levin, L., Blumberg, A., Barshad, G. & Mishmar, D. Mito-nuclear co-evolution: the  
513 positive and negative sides of functional ancient mutations. *Front. Genet.* **5**, 448.  
514 <https://doi.org/10.3389/fgene.2014.00448>.  
515
- 516 Lima, T. G., Burton, R. S. & Willett, C. S. Genomic scans reveal multiple mito-nuclear  
517 incompatibilities in population crosses of the copepod *Tigriopus californicus*. *Evolution.*  
518 **73**, 609-620 (2019).  
519
- 520 Lima, T. G. & Willett, C. S. Using Pool-seq to search for genomic regions affected by  
521 hybrid inviability in the copepod *T. californicus*. *J. Hered.* **109**, 469-476 (2018).  
522
- 523 Meiklejohn, C. D., Holmbeck, M. A., Siddiq, M. A., Abt, D. N., Rand, D. M. &  
524 Montooth, K. L. An incompatibility between a mitochondrial tRNA and its nuclear-  
525 encoded tRNA synthetase compromises development and fitness in *Drosophila*. *PLoS*  
526 *Genet.* **9**, e1003238 (2013). <https://doi.org/10.1371/journal.pgen.1003238>.  
527
- 528 Muller, H. J. Isolating mechanisms, evolution, and temperature. *Biol. Symp.* **6**, 71-125  
529 (1942).  
530
- 531 Pereira, R. J., Barreto, F. S., Pierce, N. T., Carneiro, M. & Burton, R. S. Transcriptome-  
532 wide patterns of divergence during allopatric evolution. *Mol. Ecol.* **25**, 1478-1493 (2016).  
533
- 534 Peterson, D. L., Kubow, K. B., Connolly, M. J., Kaplan, L. R., Wetkowski, M. M.,

- 535 Leong, W., Phillips, B. C. & Edmands, S. Reproductive and phylogenetic divergence of  
536 tidepool copepod populations across a narrow geographical boundary in Baja California.  
537 *J. Biogeogr.* **40**, 1664-1675 (2013).  
538
- 539 Li, H. & Durbin, R. Fast and accurate short read alignment with Burrows-Wheeler  
540 transform. *Bioinformatics.* **25**, 1754-1760 (2009).  
541
- 542 Pritchard, V. L., Dimond, L., Harrison, J. S., Velázquez, C. C., Zieba, J. T., Burton, R. S.  
543 & Edmands, S. Interpopulation hybridization results in widespread viability selection  
544 across the genome in *Tigriopus californicus*. *BMC Genet.* **12**, 54 (2011).  
545 <https://doi.org/10.1186/1471-2156-12-54>.  
546
- 547 Rand, D. M., Haney, R. A. & Fry, A. J. Cytonuclear coevolution: the genomics of  
548 cooperation. *Trends Ecol. Evol.* **19**, 645-653 (2004).  
549
- 550 Rawson, P. D. & Burton, R. S. Functional coadaptation between cytochrome *c* and  
551 cytochrome *c* oxidase within allopatric populations of a marine copepod. *Proc. Natl.*  
552 *Acad. Sci. USA.* **99**, 12955-12958 (2002).  
553
- 554 Reinhardt, K., Dowling, D. K. & Morrow, E. H. Mitochondrial replacement, evolution,  
555 and the clinic. *Science.* **341**, 1345-1346 (2013).  
556
- 557 Sambrook, J. & Russell, D. W. Purification of nucleic acids by extraction with  
558 phenol:chloroform. *Cold Spring Harb. Protoc.* **2006**, pdb-rot4455 (2006).  
559 <https://doi.org/10.1101/pdb.prot4455>.  
560
- 561 Sloan, D. B., Havird, J. C. & Sharbrough, J. The on-again, off-again relationship between  
562 mitochondrial genomes and species boundaries. *Mol. Ecol.* **26**, 2212-2236 (2017).  
563
- 564 Tsuboko-Ishii, S. & Burton, R. S. Individual culturing of *Tigriopus* copepods and  
565 quantitative analysis of their mate-guarding behavior. *J. Vis. Exp.* **139**, e58378 (2018).  
566 <https://doi.org/10.3791/58378>.  
567
- 568 Wallace, D. C. Bioenergetics, the origins of complexity, and the ascent of man. *Proc.*  
569 *Natl. Acad. Sci. USA.* **107**, 8947-8953 (2010a).  
570
- 571 Wallace, D. C. Mitochondrial DNA mutations in disease and aging. *Environ. Mol.*  
572 *Mutagen.* **51**, 440-450 (2010b).  
573
- 574 Willett, C. S. & Burton, R. S. Environmental influences on epistatic interactions:  
575 viabilities of cytochrome *c* genotypes in interpopulation crosses. *Evolution.* **57**, 2286-  
576 2292 (2003).  
577
- 578 Willett, C. S. & Burton, R. S. Viability of cytochrome *c* genotypes depends on  
579 cytoplasmic backgrounds in *Tigriopus californicus*. *Evolution.* **55**, 1592-1599 (2001).  
580

581 Willett, C. S., Lima, T. G., Kovaleva, I. & Hatfield, L. Chromosome-wide impacts on the  
582 expression of incompatibilities in hybrids of *Tigriopus californicus*. *G3-Genes Genom.*  
583 *Genet.* **6**, 1739-1749 (2016).  
584

585 **Figure 1:**

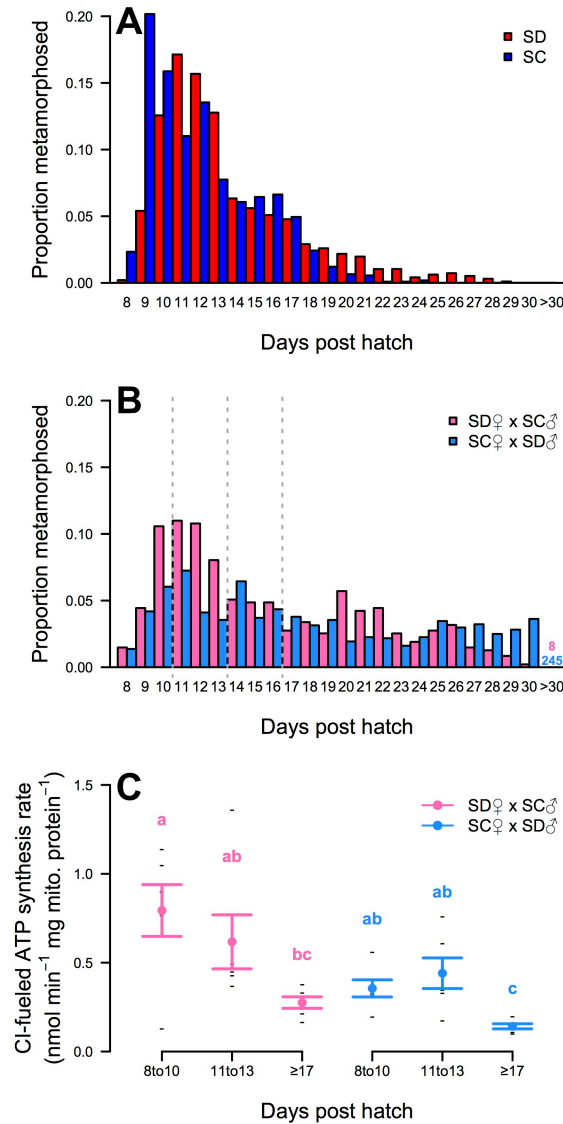

586 Fig. 1. Developmental time to metamorphosis for *T. californicus* nauplii as proportion of  
 587 individuals; A: SD (red;  $N = 963$ ) and SC (blue;  $N = 1,071$ ), and B: SD♀xSC♂ (pink;  $N$   
 588 = 473) and SC♀xSD♂ (light blue;  $N = 1,242$ ) F<sub>2</sub> hybrids. F<sub>2</sub> hybrids were split by  
 589 developmental time (dashed grey lines) and maximal complex I (CI)-fueled ATP  
 590 synthesis rates were measured for adults that metamorphosed 8-10, 11-13 and  $\geq 17$  dph  
 591 for both reciprocal crosses (C: mean  $\pm$  s.e.m. for SD♀xSC♂ - pink and SC♀xSD♂ - light  
 592 blue; all measurements - black dashes;  $N = 6$  per group). Shared lower case letters  
 593 indicate groups that do not differ significantly.

594 **Figure 2:**

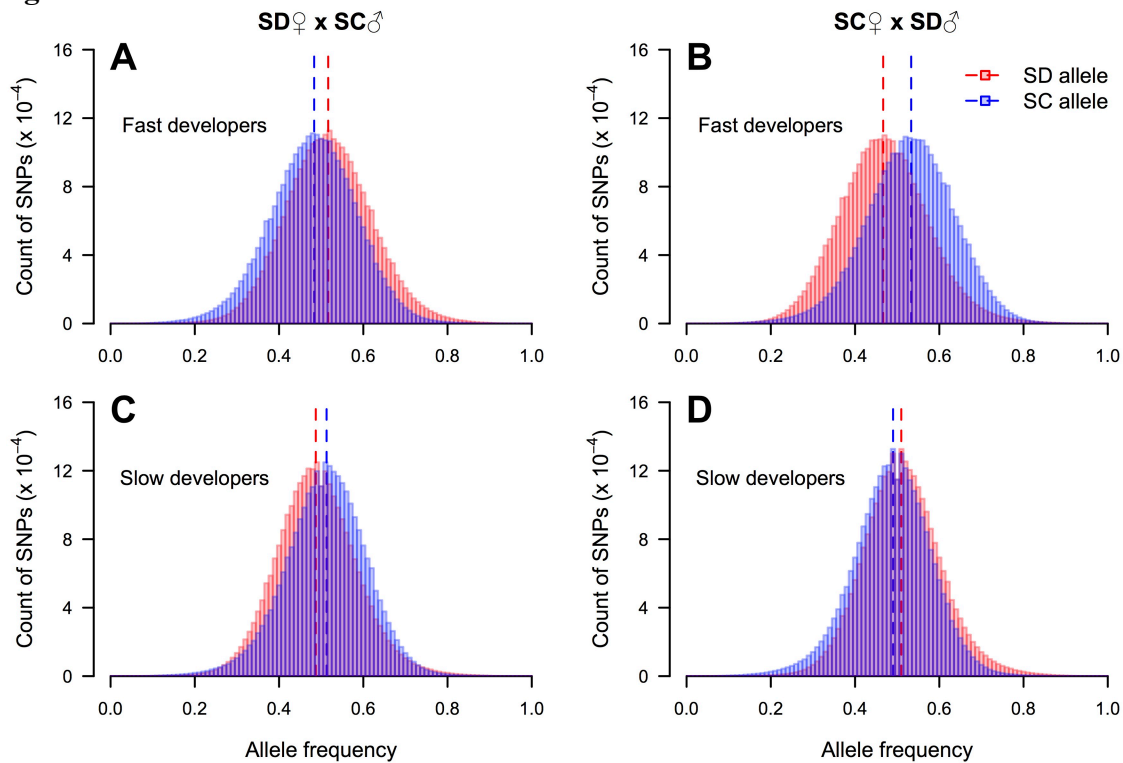

595 Fig. 2. Parental allele frequency histograms (SD - red and SC - blue) for all nuclear single  
596 nucleotide polymorphisms (SNPs;  $N = 2,768,859$ ) in fast developing (A: SD♀xSC♂; B:  
597 SC♀xSD♂) and slow developing (C: SD♀xSC♂; D: SC♀xSD♂) reciprocal F<sub>2</sub> hybrids.



598 **Figure 3:**

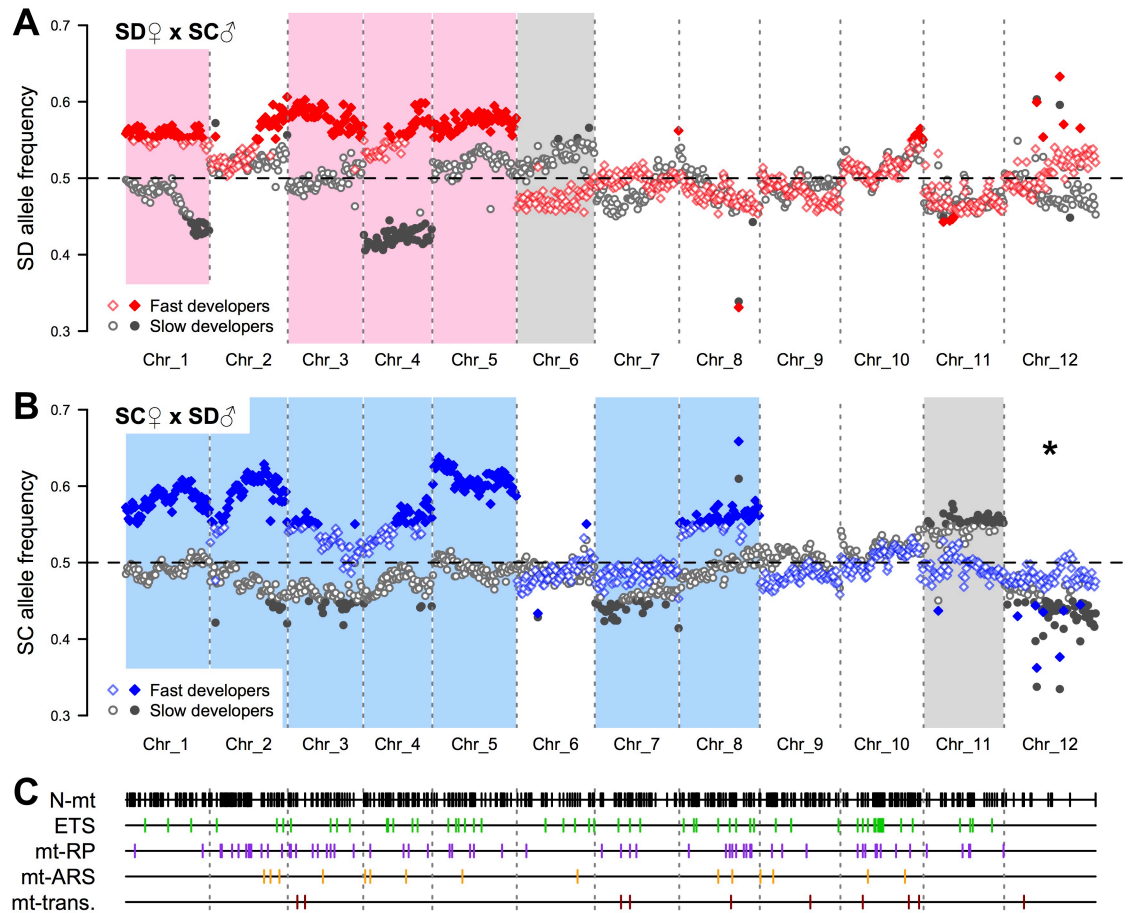

599 Fig. 3. Maternal allele frequencies in  $SD_{\text{♀}} \times SC_{\text{♂}}$  (A) and  $SC_{\text{♀}} \times SD_{\text{♂}}$  (B) fast (red or blue  
600 diamonds) and slow (grey circles) developing  $F_2$  hybrids. Shaded boxes indicate  
601 chromosomes with significant deviations consistent with mitonuclear interactions (pink  
602 and light blue - maternal bias in fast compared to slow developers; grey - maternal bias in  
603 slow compared to fast developers). Filled symbols show allele frequency deviations  
604  $\geq 0.05$  from the expected value of 0.5. The asterisk indicates a significant difference in  
605 allele frequencies between fast and slow developers that was unresolved by quantile  
606 comparisons. Locations of 599 nuclear-encoded mitochondrial genes are displayed in  
607 Panel C (all N-mt genes - black; classes of  $N_{\text{O}}$ -mt genes: electron transport system [ETS]  
608 - green; ribosomal proteins [mt-RP] - purple; aminoacyl tRNA synthetases [mt-ARS] -  
609 orange; transcription and DNA replication [mt-trans.] - dark red).  
610

611 **Figure 4:**

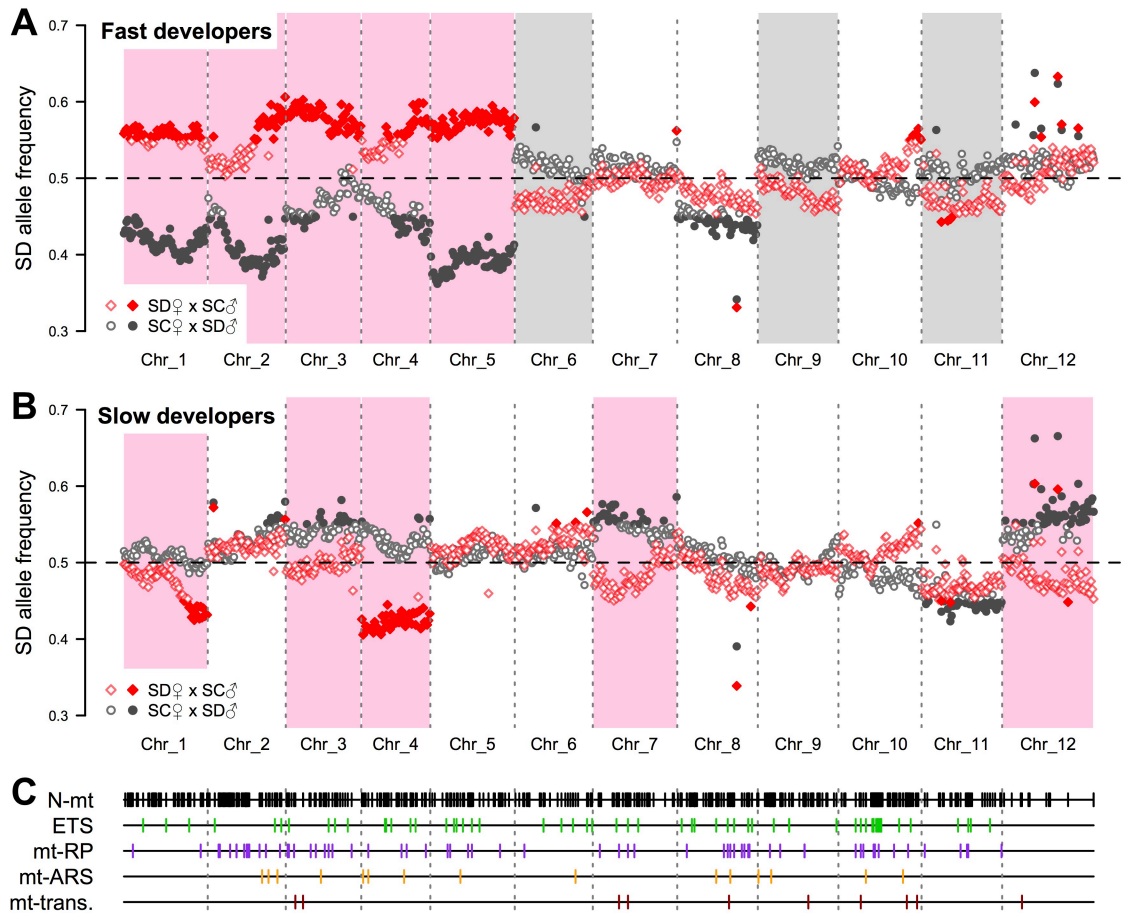

612 Fig. 4. SD allele frequencies in fast (A) and slow (B) developing  $SD_{\text{♀}} \times SC_{\text{♂}}$  (red  
613 diamonds) and  $SC_{\text{♀}} \times SD_{\text{♂}}$  (grey circles)  $F_2$  hybrids. Pink and grey shaded boxes indicate  
614 chromosomes with significant deviations consistent with positive effects of mitonuclear  
615 matching or mismatching, respectively, on developmental rate. Filled symbols show  
616 allele frequency deviations  $\geq 0.05$  from the expected value of 0.5. Locations of 599  
617 nuclear-encoded mitochondrial genes are display in Panel C (all N-mt genes - black;  
618 classes of  $N_{\text{O}}$ -mt genes: electron transport system [ETS] - green; ribosomal proteins [mt-  
619 RP] - purple; aminoacyl tRNA synthetases [mt-ARS] - orange; transcription and DNA  
620 replication [mt-trans.] - dark red).

621 **Figure 5:**

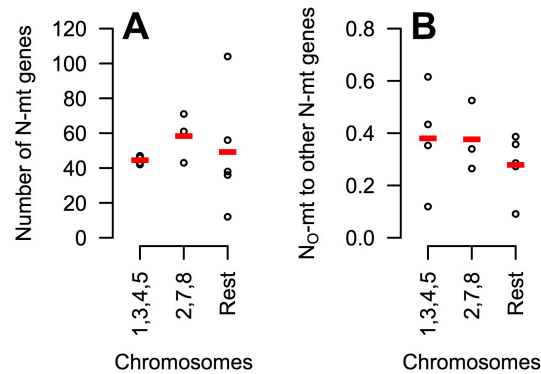

622 Fig. 5. Number of nuclear-encoded mitochondrial (N-mt) genes (A) and ratios of putative  
623 interacting (N<sub>O</sub>-mt genes) to other N-mt genes (B) for all twelve *T. californicus*  
624 chromosomes. Chromosomes are grouped by those that were consistent with effects of  
625 mitonuclear matching on development detected and resolved in both the SD♀xSC♂ and  
626 SC♀xSD♂ crosses (1, 3, 4 and 5), in only the SC♀xSD♂ cross (2, 7 and 8), or in neither  
627 of the crosses (6, 9, 10, 11 and 12): individual chromosome values - black circles; mean  
628 values - red dashes.

**Table 1:** SD♀xSC♂ sequencing and allele frequency summary.

| Chromosome | Number of 250kb windows | Number of SNPs | SNPs per window <sup>1</sup> | KS test <i>p</i> -value  | Developmental time (dph) | Average coverage | SD allele frequency for 250 kb windows |           |           |
|------------|-------------------------|----------------|------------------------------|--------------------------|--------------------------|------------------|----------------------------------------|-----------|-----------|
|            |                         |                |                              |                          |                          |                  | $\mu$                                  | $q_{0.1}$ | $q_{0.9}$ |
| One        | 66                      | 263,305        | 3989 ± 571                   | 1.6 x 10 <sup>-4</sup> * | 8-12                     | 66X              | 0.555                                  | 0.546     | 0.565     |
|            |                         |                |                              |                          | >22                      | 77X              | 0.470                                  | 0.432     | 0.493     |
| Two        | 61                      | 221,662        | 3634 ± 920                   | 0.58                     | 8-12                     | 66X              | 0.543                                  | 0.512     | 0.582     |
|            |                         |                |                              |                          | >22                      | 78X              | 0.523                                  | 0.512     | 0.535     |
| Three      | 59                      | 223,269        | 3784 ± 987                   | 1.6 x 10 <sup>-4</sup> * | 8-12                     | 67X              | 0.578                                  | 0.560     | 0.596     |
|            |                         |                |                              |                          | >22                      | 78X              | 0.498                                  | 0.485     | 0.516     |
| Four       | 54                      | 205,183        | 3800 ± 928                   | 5.8 x 10 <sup>-4</sup> * | 8-12                     | 66X              | 0.554                                  | 0.529     | 0.577     |
|            |                         |                |                              |                          | >22                      | 78X              | 0.423                                  | 0.412     | 0.435     |
| Five       | 66                      | 256,052        | 3880 ± 645                   | 1.6 x 10 <sup>-4</sup> * | 8-12                     | 65X              | 0.573                                  | 0.560     | 0.584     |
|            |                         |                |                              |                          | >22                      | 76X              | 0.519                                  | 0.503     | 0.534     |
| Six        | 61                      | 223,748        | 3668 ± 1086                  | 5.8 x 10 <sup>-4</sup> * | 8-12                     | 63X              | 0.473                                  | 0.460     | 0.487     |
|            |                         |                |                              |                          | >22                      | 76X              | 0.527                                  | 0.509     | 0.546     |
| Seven      | 66                      | 244,443        | 3703 ± 817                   | 0.02                     | 8-12                     | 65X              | 0.499                                  | 0.488     | 0.510     |
|            |                         |                |                              |                          | >22                      | 76X              | 0.482                                  | 0.458     | 0.510     |
| Eight      | 63                      | 236,290        | 3750 ± 717                   | 0.58                     | 8-12                     | 65X              | 0.475                                  | 0.462     | 0.495     |
|            |                         |                |                              |                          | >22                      | 77X              | 0.481                                  | 0.460     | 0.511     |
| Nine       | 63                      | 231,348        | 3672 ± 751                   | 0.58                     | 8-12                     | 65X              | 0.481                                  | 0.462     | 0.500     |
|            |                         |                |                              |                          | >22                      | 77X              | 0.490                                  | 0.477     | 0.499     |
| Ten        | 65                      | 252,232        | 3880 ± 696                   | 0.66                     | 8-12                     | 67X              | 0.516                                  | 0.497     | 0.549     |
|            |                         |                |                              |                          | >22                      | 79X              | 0.516                                  | 0.501     | 0.536     |
| Eleven     | 63                      | 225,229        | 3575 ± 837                   | 0.66                     | 8-12                     | 65X              | 0.469                                  | 0.455     | 0.490     |
|            |                         |                |                              |                          | >22                      | 77X              | 0.470                                  | 0.458     | 0.485     |
| Twelve     | 72                      | 186,098        | 2585 ± 1360                  | 6.2 x 10 <sup>-3</sup>   | 8-12                     | 67X              | 0.514                                  | 0.486     | 0.538     |
|            |                         |                |                              |                          | >22                      | 78X              | 0.486                                  | 0.462     | 0.507     |

<sup>1</sup>  $\mu \pm \sigma$ ; \* significant after Bonferroni correction

**Table 2:** SC♀xSD♂ sequencing and allele frequency summary.

| Chromosome | Number of 250kb windows | Number of SNPs | SNPs per window <sup>1</sup> | KS test <i>p</i> -value  | Developmental time (dph) | Average coverage | SC allele frequency for 250 kb windows |           |           |
|------------|-------------------------|----------------|------------------------------|--------------------------|--------------------------|------------------|----------------------------------------|-----------|-----------|
|            |                         |                |                              |                          |                          |                  | $\mu$                                  | $q_{0.1}$ | $q_{0.9}$ |
| One        | 66                      | 263,305        | 3989 ± 571                   | 1.6 x 10 <sup>-4</sup> * | 8-12                     | 67X              | 0.582                                  | 0.563     | 0.598     |
|            |                         |                |                              |                          | >22                      | 80X              | 0.492                                  | 0.481     | 0.504     |
| Two        | 61                      | 221,662        | 3634 ± 920                   | 5.8 x 10 <sup>-4</sup> * | 8-12                     | 67X              | 0.586                                  | 0.545     | 0.614     |
|            |                         |                |                              |                          | >22                      | 80X              | 0.470                                  | 0.448     | 0.493     |
| Three      | 59                      | 223,269        | 3784 ± 987                   | 1.6 x 10 <sup>-4</sup> * | 8-12                     | 69X              | 0.533                                  | 0.505     | 0.553     |
|            |                         |                |                              |                          | >22                      | 81X              | 0.456                                  | 0.446     | 0.472     |
| Four       | 54                      | 205,183        | 3800 ± 928                   | 5.8 x 10 <sup>-4</sup> * | 8-12                     | 68X              | 0.546                                  | 0.522     | 0.570     |
|            |                         |                |                              |                          | >22                      | 80X              | 0.471                                  | 0.454     | 0.489     |
| Five       | 66                      | 256,052        | 3880 ± 645                   | 1.6 x 10 <sup>-4</sup> * | 8-12                     | 66X              | 0.609                                  | 0.593     | 0.627     |
|            |                         |                |                              |                          | >22                      | 78X              | 0.492                                  | 0.481     | 0.505     |
| Six        | 61                      | 223,748        | 3668 ± 1086                  | 0.58                     | 8-12                     | 67X              | 0.486                                  | 0.468     | 0.505     |
|            |                         |                |                              |                          | >22                      | 78X              | 0.488                                  | 0.476     | 0.500     |
| Seven      | 66                      | 244,443        | 3703 ± 817                   | 1.6 x 10 <sup>-4</sup> * | 8-12                     | 68X              | 0.486                                  | 0.472     | 0.498     |
|            |                         |                |                              |                          | >22                      | 80X              | 0.451                                  | 0.435     | 0.464     |
| Eight      | 63                      | 236,290        | 3750 ± 717                   | 5.8 x 10 <sup>-4</sup> * | 8-12                     | 67X              | 0.556                                  | 0.542     | 0.570     |
|            |                         |                |                              |                          | >22                      | 79X              | 0.494                                  | 0.478     | 0.513     |
| Nine       | 63                      | 231,348        | 3672 ± 751                   | 8.2 x 10 <sup>-3</sup>   | 8-12                     | 68X              | 0.480                                  | 0.468     | 0.493     |
|            |                         |                |                              |                          | >22                      | 80X              | 0.503                                  | 0.487     | 0.518     |
| Ten        | 65                      | 252,232        | 3880 ± 696                   | 0.09                     | 8-12                     | 69X              | 0.505                                  | 0.488     | 0.520     |
|            |                         |                |                              |                          | >22                      | 81X              | 0.516                                  | 0.496     | 0.532     |
| Eleven     | 63                      | 225,229        | 3575 ± 837                   | 1.6 x 10 <sup>-4</sup> * | 8-12                     | 69X              | 0.493                                  | 0.480     | 0.508     |
|            |                         |                |                              |                          | >22                      | 79X              | 0.547                                  | 0.532     | 0.561     |
| Twelve     | 72                      | 186,098        | 2585 ± 1360                  | 4.1 x 10 <sup>-5</sup> * | 8-12                     | 71X              | 0.475                                  | 0.465     | 0.498     |
|            |                         |                |                              |                          | >22                      | 83X              | 0.444                                  | 0.418     | 0.470     |

<sup>1</sup>  $\mu \pm \sigma$ ; \* significant after Bonferroni correction
